# Supplementary material for: Doping-mediated electronic and magnetic properties of graphene-like ionic NaX (X = F and Cl) monolayers
Source: Royal Society of Chemistry journal article supplement (doi:10.1039/d3cp02115g), 2023-01-01
Supplement: d3cp02115g1.pdf [file d3cp02115g1.pdf]

## Doping-mediated electronic and magnetic properties of graphene-like ionic NaX (X = F and Cl) monolayers

Bich Ngoc Nguyen Thi,<sup>1</sup> Chu Viet Ha,<sup>2</sup> Nghiem Thi Ha Lien,<sup>3</sup> J. Guerrero-Sanchez,<sup>4</sup> and D. M. Hoat<sup>5,6,\*</sup>

<sup>1</sup>Institute of Physics, Vietnam Academy of Science and Technology, 18 Hoang Quoc Viet, Cau Giay, Hanoi, Vietnam

<sup>2</sup>Faculty of Physics, TNU-University of Education, Thai Nguyen, 250000, Vietnam

<sup>3</sup>Institute of Physics, Vietnam Academy of Science and Technology, 10 Dao Tan, Ba Dinh, Hanoi, Vietnam

<sup>4</sup>Universidad Nacional Autónoma de México, Centro de Nanociencias y Nanotecnología, Apartado Postal 14, Ensenada, Baja California, Código Postal 22800, Mexico

<sup>5</sup>Institute of Theoretical and Applied Research, Duy Tan University, Ha Noi 100000, Viet Nam

<sup>6</sup>Faculty of Natural Sciences, Duy Tan University, Da Nang 550000, Viet Nam

\*Corresponding author: [dominhhoat@duytan.edu.vn](mailto:dominhhoat@duytan.edu.vn)

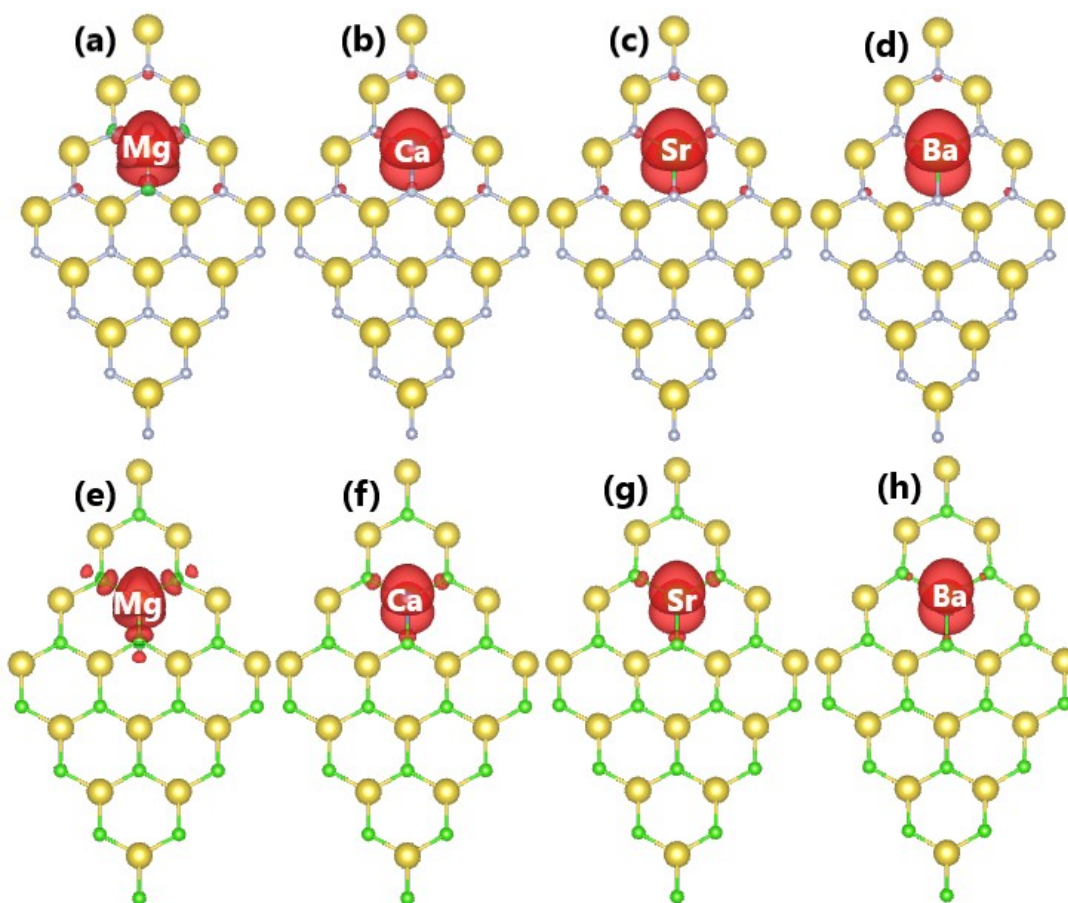

Figure S1: Figure 6. Spin density (Iso-surface value:  $0.001 e/\text{\AA}^3$ ; Na: yellow ball; F: grey ball; Cl: green ball) in NaF monolayer doped with (a) Mg, (b) Ca, (c) Sr, and (d) Ba; and NaCl monolayer doped with (e) Mg, (f) Ca, (g) Sr, and (h) Ba.

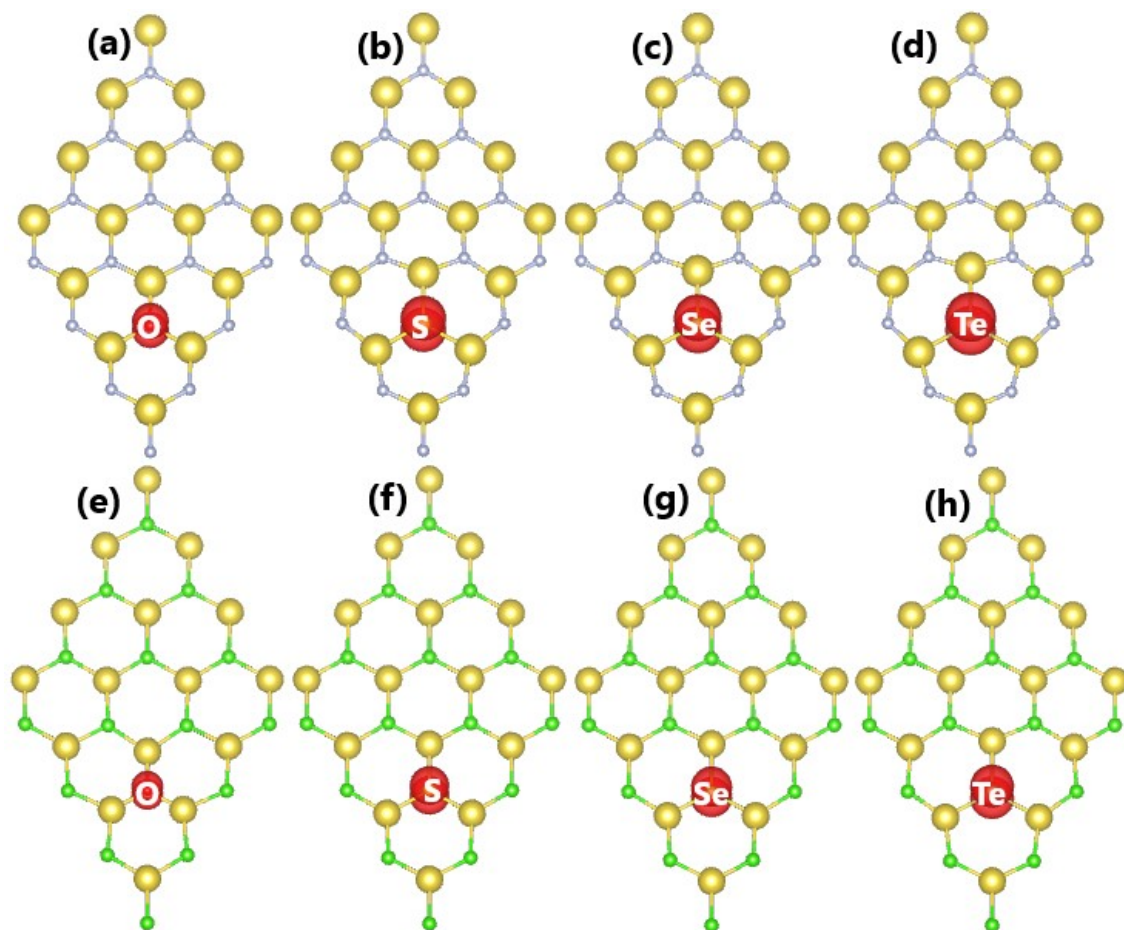

Figure S2: Figure 10. Spin density (Iso-surface value:  $0.004 e/\text{\AA}^3$ ; Na: yellow ball; F: grey ball; Cl: green ball) in NaF monolayer doped with (a) O, (b) S, (c) Se, and (d) Te; and NaCl monolayer doped with (e) O, (f) S, (g) Se, and (h) Te.

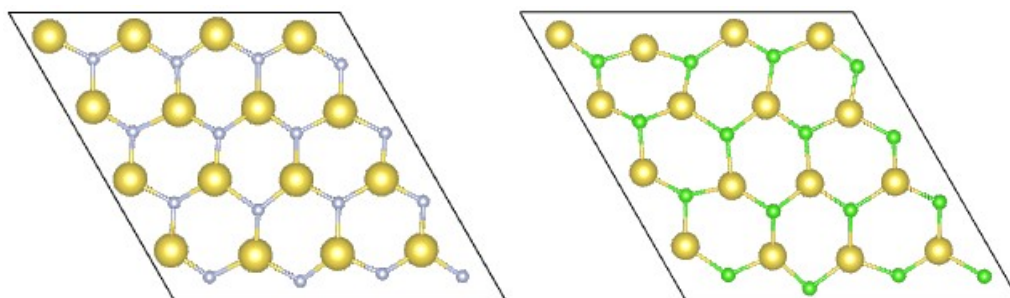

Fig.S3: Atomic structure of NaF (left side) and NaCl (right side) monolayer after 5000 fs of AIMD simulations.

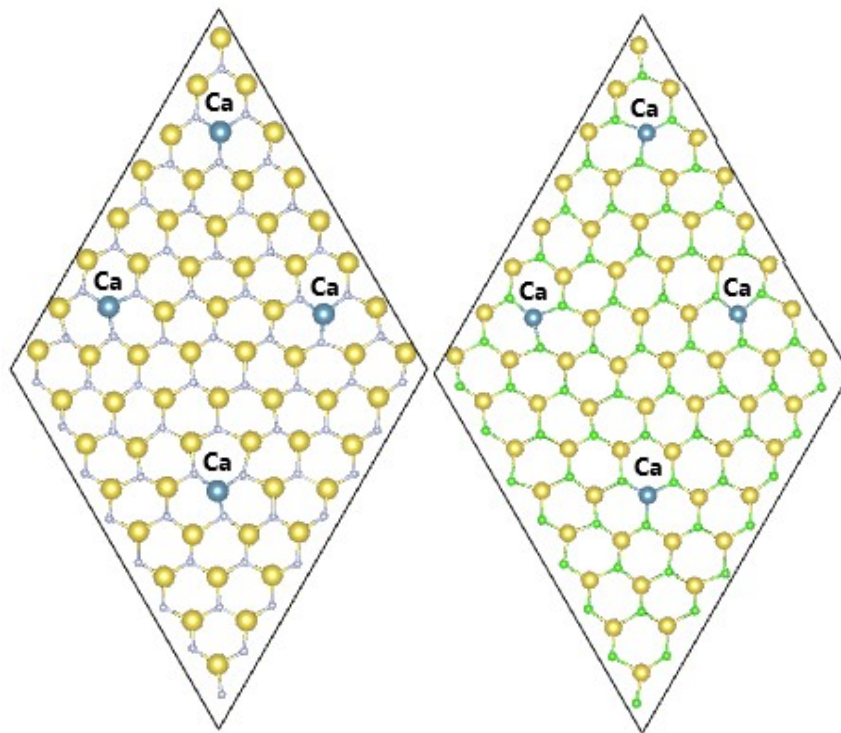

Fig.S3 (cont): Atomic structure of Ca-doped NaF (left side) and Ca-doped NaCl (right side) monolayer after 5000 fs of AIMD simulations.

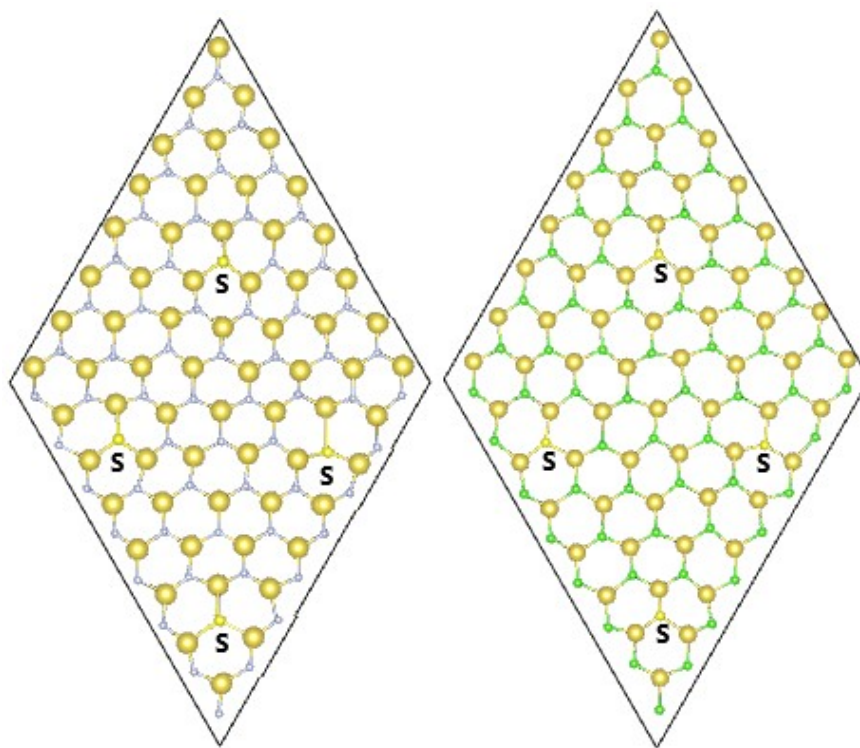

Fig.S3 (cont): Atomic structure of S-doped NaF (left side) and S-doped NaCl (right side) monolayer after 5000 fs of AIMD simulations.

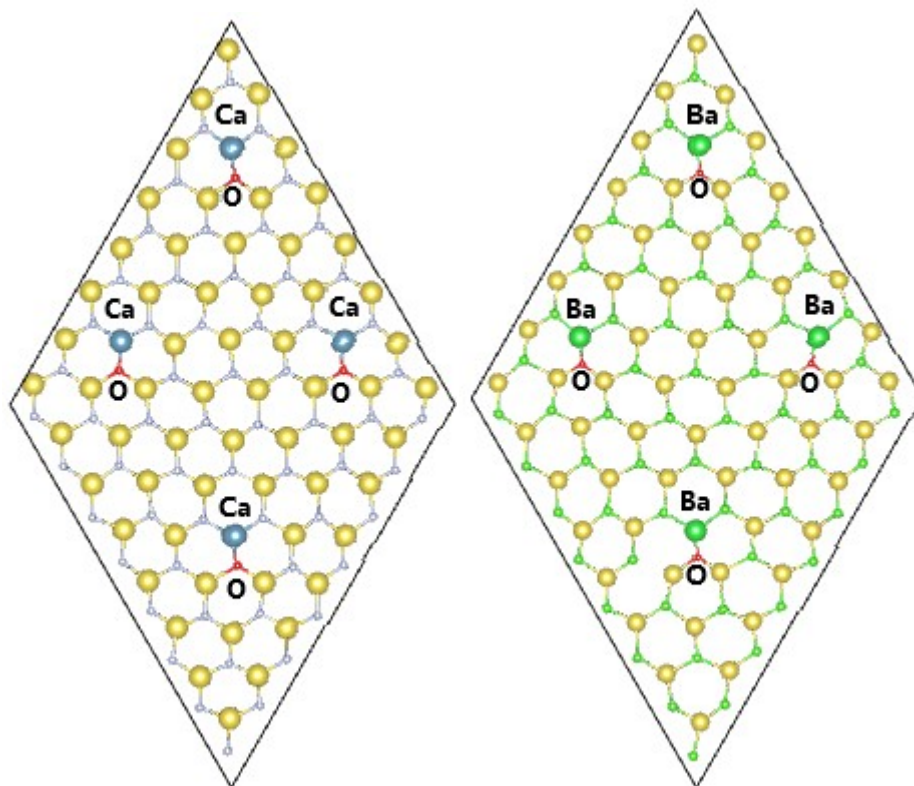

Fig.S3 (cont): Atomic structure of CaO1-codoped NaF (left side) and BaO1-codoped NaCl (right side) monolayer after 5000 fs of AIMD simulations.
